1 **Main Manuscript for**

2 **Structural insights into the activation of autoinhibited human lipid**  
3 **flippase ATP8B1 upon substrate binding**

4 Meng-Ting Cheng<sup>1, 2, 3, #</sup>, Yu Chen<sup>1, 2, 3, #</sup>, Zhi-Peng Chen<sup>1, 2, 3</sup>, Cong-Zhao Zhou<sup>1, 2, 3\*</sup>, Wen-Tao  
5 Hou<sup>1, 2, 3\*</sup>, and Yuxing Chen<sup>1, 2, 3\*</sup>

6 <sup>1</sup>Hefei National Laboratory for Physical Sciences at the Microscale and School of Life Sciences,  
7 University of Science and Technology of China.

8 <sup>2</sup>The First Affiliated Hospital of USTC, Division of Life Sciences and Medicine, University of Science  
9 and Technology of China, Hefei, Anhui 230027, China.

10 <sup>3</sup>Biomedical Sciences and Health Laboratory of Anhui Province, University of Science &  
11 Technology of China, Hefei 230027, China.

12 \*Correspondence author: Yuxing Chen, Wen-Tao Hou, Cong-Zhao Zhou

13 **Email:** cyxing@ustc.edu.cn (Y.C.), todvince@mail.ustc.edu.cn (W.T.H) or zcz@ustc.edu.cn  
14 (C.Z.Z.)

15 **Author Contributions:** #These authors contributed equally to this work.

16 **Competing Interest Statement:** The authors declare no competing financial interests.

17 **Classification:** Biological Sciences/Biophysics and Computational Biology

18 **Keywords:** ATP8B1, P4-type ATPase, phospholipid flippase, bile acid, Cryo-EM structure.

19 **This PDF file includes:**

20 Main Text  
21 Figures 1 to 5

## 22 **Abstract**

23 The human P4-type ATPase ATP8B1 in complex with the auxiliary noncatalytic protein CDC50A  
24 or CDC50B mediates the transport of cell membrane lipids from the outer to the inner membrane  
25 leaflet, which is crucial to maintain the asymmetry of membrane lipid. Its dysfunction usually leads  
26 to imbalance of bile acid circulation, and eventually causing intrahepatic cholestasis diseases. Here  
27 we found that both ATP8B1-CDC50A and ATP8B1-CDC50B possess a higher ATPase activity in  
28 the presence of the most favored substrate phosphatidylserine (PS); and moreover, the PS-  
29 stimulated activity could be augmented upon the addition of bile acids. The cryo-electron  
30 microscopy structures of ATP8B1-CDC50A at 3.36 Å and ATP8B1-CDC50B at 3.39 Å enabled us  
31 to capture an unprecedented phosphorylated and autoinhibited state, with the N- and C-terminal  
32 tails separately inserting into the cytoplasmic inter-domain clefts of ATP8B1. The PS-bound  
33 ATP8B1-CDC50A structure at 3.98 Å indicated the autoinhibited state could be released upon PS  
34 binding. Structural analysis combined with mutagenesis revealed the residues that determine the  
35 substrate specificity, and a unique positively charged loop in the phosphorylated domain of ATP8B1  
36 for the recruitment of bile acids. Altogether, we updated the Post-Albers transport cycle, with an  
37 extra autoinhibited state of ATP8B1, which could be activated upon substrate binding. These  
38 findings not only provide structural insights into the ATP8B1-mediated restoration of human  
39 membrane lipid asymmetry during bile acid circulation, but also advance our understanding on the  
40 molecular mechanism of P-type ATPases.

41

## 42 **Main Text**

43

### 44 **Introduction**

45

46 The eukaryotic cell membrane consists of a variety of lipids, which are asymmetrically distributed  
47 across the lipid bilayer (1). Phosphatidylcholine (PC), sphingomyelin (SM) and glycolipids are  
48 enriched at the outer leaflet of the plasma membrane, whereas phosphatidylserine (PS),  
49 phosphatidylethanolamine (PE) and phosphatidylinositol (PI) are mainly restricted to the inner  
50 leaflet. The asymmetric distribution of lipids is essential to maintain cellular functions, including cell  
51 and organelle shape determination and dynamics, vesicle budding and trafficking, membrane  
52 stability and impermeability, cell signaling, apoptosis, and homeostasis of bile and cholesterol (2,  
53 3). The disturbance of lipid asymmetry will lead to the imbalance of cell membrane and eventually  
54 cell death. For instance, loss of PS asymmetry is an early indicator of cell apoptosis, as well as a  
55 signal to initiate blood clotting (4). To maintain membrane asymmetry, eukaryotic cells express a  
56 series of cooperatively functioning lipid transporters, such as scramblases, floppases and flippases.  
57 Scramblases, which are energy independent, drive bidirectional lipid scrambling in response to  
58 intracellular concentrations of  $Ca^{2+}$  (5); whereas floppases, which are usually ATP-binding cassette  
59 (ABC) transporters, mediate the unidirectional translocation of lipids from the inner to the outer  
60 leaflet of the membrane bilayer (6). In contrast, flippases are usually type 4 P-type ATPase (P4-  
61 ATPase) in eukaryotic cells, which transport phospholipids from the outer leaflet to the inner leaflet  
62 (3).

63

64 The widespread P-type ATPases, which are featured with a phosphorylated intermediate during  
65 the transport cycle (P stands for phosphorylation), catalyze the transport of ions or phospholipids  
66 by utilizing the energy of ATP hydrolysis (7, 8). The human genome encodes a total of 14 P4-  
67 ATPase members, which are grouped into 5 classes, namely, Classes 1a, 1b, 2, 5 and 6 (3). For  
68 proper localization and integral function, P4-ATPases, except for Class 2 members (9), should form  
69 a complex with an auxiliary noncatalytic protein of the CDC50 family (10). To date, three CDC50  
70 paralogs (CDC50A, CDC50B and CDC50C) have been identified in mammals (11). P4-ATPases  
71 from Class 1a, Class 5 and Class 6 bind to only CDC50A (10, 12), whereas those from Class 1b  
72 are able to form complexes with either CDC50A or CDC50B (12, 13). Recently, a series of  
73 structures of human P4-ATPases from Class 1a (ATP8A1) and Class 6 (ATP11C) complexed with

74 CDC50A have been reported (14-16). However, the complex structure of P4-ATPase from Class  
75 1b with CDC50A/B remains unknown.

76

77 ATP8B1, a member of Class 1b P4-ATPase, is also known as FIC1 (familial intrahepatic  
78 cholestasis type 1) (17). It colocalizes with the primary bile salt export pump ABCB11 in  
79 cholangiocytes and the canalicular membrane of hepatocytes (18). To counteract the disturbance  
80 of the asymmetric homeostasis of the cell membrane resulting from lipid flow accompanied by bile  
81 acid transport driven by ABCB11 (19), the floppase ABCB4 exports PC to envelop bile acid micelles  
82 (20), and ATP8B1 flips PS (21) or PC (22) from the outer to the inner membrane leaflet to restore  
83 membrane asymmetry. Defects in ATP8B1 are usually associated with severe human diseases,  
84 such as the intrahepatic cholestasis diseases PFIC1 (progressive familial intrahepatic cholestasis  
85 type 1) and BRIC1 (benign recurrent intrahepatic cholestasis type 1) (23).

86

87 Here, we solved the cryo-electron microscopy (cryo-EM) structures of apo-form ATP8B1-CDC50A  
88 and ATP8B1-CDC50B, and a PS-bound structure of ATP8B1-CDC50A. These structures  
89 unraveled a yet-unknown autoinhibited phosphorylated state of P-type ATPases, which is activated  
90 upon substrate binding. These findings not only advance our understanding of the molecular  
91 mechanism of P-type ATPases, but also provide a structural platform for further therapeutic  
92 intervention of intrahepatic cholestasis diseases.

93

## 94 Results

95

96 **The ATPase activities of ATP8B1-CDC50A/B are significantly stimulated by PS.** We  
97 overexpressed human ATP8B1-CDC50A and ATP8B1-CDC50B in HEK29F cells, with a 3xFlag  
98 tag fused to the N-terminus of ATP8B1, and purified the complexes using an affinity column  
99 followed by size-exclusion chromatography. SDS-PAGE indicated that both complexes were  
100 purified in a homogeneous state (Fig. S1). As substrates were reported to greatly enhance the  
101 ATPase activity of P4-ATPases (14, 16, 24), we performed ATPase activity in the presence or  
102 absence of different phospholipids at 300  $\mu\text{M}$ . DDM (1%) was added as the hydrotropic agent for  
103 the dissolution of lipids to produce clear and homogeneous stock solutions at room temperature.  
104 The ATPase activities of both ATP8B1-CDC50A and ATP8B1-CDC50B showed a significant  
105 increase when PS was added compared to the basal activity (Fig. 1A). The  $K_m$  values of PS-  
106 dependent ATPase activities for the ATP8B1-CDC50A and ATP8B1-CDC50B complexes were  
107  $92.6 \pm 19.2$  and  $87.6 \pm 9.1$   $\mu\text{M}$ , with  $V_{max}$  values of  $248.1 \pm 22.3$  and  $195.4 \pm 7.1$   $\text{nmol min}^{-1} \text{mg}^{-1}$ ,  
108 respectively (Fig. 1B). However, PC only showed a modest stimulation of the ATPase activity for  
109 ATP8B1-CDC50B but no significant effect for ATP8B1-CDC50A. In contrast, PE had no effect on  
110 ATPase activity stimulation for both complexes. These results revealed that both ATP8B1-CDC50A  
111 and ATP8B1-CDC50B possess a higher ATPase activity in the presence of PS, compared to PC.

112

113 **Bile acids can further augment the ATPase activity.** It is puzzling that the  $V_{max}$  of ATP8B1 is  
114 less than 1/6 of the previously reported P4-ATPases (14, 16, 24). Notably, the yeast P4-ATPase  
115 Drs2p in complex with Cdc50p with a non-detectable ATPase activity in the presence of substrate,  
116 could be activated by an activator molecule, lipid phosphatidylinositol 4-phosphate (PI4P) (25). In  
117 addition, bile acids could enhance the ATPase activities of ABCB4 (26) and ABCG5/G8 (27), both  
118 of which are localized in hepatocytes like ATP8B1. Thus, we tested the ATPase activity of ATP8B1-  
119 CDC50A/B complexes in the presence of cholate, the main component of bile acids. However, the  
120 addition of cholate alone only exhibited a slight increase in activity for both complexes, compared  
121 to the basal activity (Fig. 1C). Compared to PS solubilized in the detergent DDM with ~50% activity  
122 increase, the two complexes in the presence of PS solubilized in cholate displayed 4- and 8-fold  
123 activities, respectively (Fig. 1C). Notably, the activity was completely inhibited by  $\text{AlF}_4^-$ , an inhibitor  
124 of P-type ATPases (28). The ATPase activity assays in the presence of PS solubilized in other  
125 detergents, such as OG and GDN, gave a result similar to that in DDM (Fig. S2). Moreover, PS  
126 solubilized in either primary or secondary conjugated bile acids could greatly augment the ATPase  
127 activity (Fig. 1D), compared to that in DDM. Notably, tauro-conjugated bile acids, including

128 taurocholic acid (TC), have higher augmentation rates. All these data suggested that various bile  
129 acids can augment the PS-simulated ATPase activity of ATP8B1-CDC50A/B.

130

131 **Overall structures of ATP8B1-CDC50A and ATP8B1-CDC50B.** We solved the cryo-EM  
132 structures of the ATP8B1-CDC50A and ATP8B1-CDC50B complexes at 3.36 and 3.39 Å,  
133 respectively (Fig. 2A and Fig. 2B), which followed the gold-standard Fourier shell correlation  
134 criterion of 0.143 (Fig. S3 and Fig. S4). Superposition of the two complex structures yields a root-  
135 mean-square deviation (RMSD) of 0.42 Å over 990 C $\alpha$  atoms, indicating that the two structures  
136 resemble each other. Similar to the previously reported P4-ATPase structures, ATP8B1 also has a  
137 TM (transmembrane) domain of 10 TMs (TM1-10) and three cytoplasmic domains: the A (actuator),  
138 N (nucleotide) and P (phosphorylation) domains (Fig. 2A and Fig. 2B). The N domain is responsible  
139 for binding to ATP, which donates the phosphate group for autophosphorylation of the conserved  
140 Asp454 of the P domain, generating a phosphorylated intermediate during the transport cycle. The  
141 A domain can dephosphorylate the phosphorylated P domain via the catalytic residue Glu234, and  
142 finally triggering substrate translocation. In addition, the N-terminus and C-terminus form long loops,  
143 termed the N-tail and C-tail, respectively, which might function as regulatory domains (29). In both  
144 complexes, superposition of CDC50A and CDC50B gives a quite similar structure with an RMSD  
145 of 0.79 Å over 269 C $\alpha$  atoms, in agreement with their high sequence identity of 54% (Fig. S5).  
146 CDC50A/B interact with ATP8B1 through the extracellular domains, the two TMs and an  
147 unstructured loop proceeding the N-terminus of the TMs, forming three interfaces almost identical  
148 in the two complexes. These interfaces are conserved in known structures of P4-ATPases  
149 complexed with CDC50A (14, 15).

150

151 **ATP8B1 adopts an autoinhibited E2P state.** The transport cycle of P4-ATPases has been clearly  
152 depicted by the Post-Albers scheme (30, 31), including several intermediate states (Fig. S6): ATP  
153 binding (E1-ATP), phosphorylated (E1P and E2P), substrate binding (E2Pi-PL), dephosphorylated  
154 (E2) and substrate release (E1) state (8). These states have been captured in a previous report of  
155 the cryo-EM structure of ATP8A1-CDC50A (14). Superposition of ATP8B1 with the known  
156 structures of ATP8A1 revealed that ATP8B1 possesses a lowest RMSD of 2.01 Å with ATP8A1  
157 in the E2P state (Fig. S7).

158

159 In our two structures, an extra density could be found at the proximity of residue Asp454 from the  
160 conserved DKGT motif of the P domain, which could be fitted with a PO $_4^-$  and a Mg $^{2+}$  ion (Fig. 2C),  
161 indicating that Asp454 is phosphorylated. The Mg $^{2+}$  ion is coordinated by Asp454, Thr456, Asp893  
162 and PO $_4^-$  (Fig. 2C). However, the catalytic residue Glu234 from the conserved DGET motif of the  
163 A domain is stabilized by Asp232, Lys238 and Arg867 via salt bridges and hydrogen bonds. As a  
164 result, the phosphorylated Asp454 is too far away from Glu234 to be dephosphorylated, which is a  
165 feature of the E2P state (14). Thus, ATP8B1 is most likely in the E2P state, in which the P domain  
166 has been phosphorylated and ready to bind the substrate.

167

168 Of note, both the N-tail and C-tail of ATP8B1 insert into the clefts of the three cytoplasmic domains  
169 (Fig. 2A and Fig. 2B). Specifically, the N-tail interacts with the P domain by two pairs of hydrogen  
170 bonds (Glu20-Ser598 and Asp26-Asn807) and hydrophobic interactions between Pro17 and  
171 Trp805 (Fig. 2D). The C-tail interacts with the P domain via the cation- $\pi$  interaction between  
172 Arg1206-Phe744, the A domain via  $\pi$ - $\pi$  interaction between Phe239-Tyr1217 and a hydrogen bond  
173 between Asn221-Arg1225, and the N domain via two pairs of salt bridges between Asp644-  
174 Arg1205 and Asp684-Arg1215 (Fig. 2E). Remarkably, Phe1211 from the conserved GYAFS motif  
175 occupies the ATP binding site (Fig. 2E). Truncation of either the N-tail or C-tail of ABT8B1 resulted  
176 in an increased ATPase activity of ~2 or 3-fold to that of the wild type, respectively (Fig. 2F), further  
177 suggesting that ATP8B1 basically adopts an autoinhibited E2P state.

178

179 **The positively charged P-loop is responsible for the recruitment of bile acids.** Structural  
180 analysis revealed three positively charged regions on ATP8B1: an outstretched P-loop from the P  
181 domain (residues Lys813-Lys846) and two segments from the C-tail, which are termed C-helix

182 (residues Ser1172-Arg1184) and C-turn (residues Arg1193-Arg1206), respectively (Fig. 3A). There  
183 are 16 positively charged residues in the 34-residue P-loop of ATP8B1, which is absent in other  
184 P4-type ATPases (Fig. 3B). C-helix is a short helix corresponding to the amphipathic helix of yeast  
185 Drs2p, which is adjacent to the binding site of the activator PI4P (32), while C-turn is an arginine-  
186 rich sharp turn of C-tail (Fig. S8).

187  
188 Hence, we truncated the P-loop (residues from Lys813 to Lys846) and mutated the positively  
189 charged residues in C-helix (K1177E-K1180E-H1181D-R1182E-K1183E-R1184E-K1186E) and C-  
190 turn (R1194T-R1199S-R1200S-R1206S) for ATPase activity assays. The results showed that the  
191 truncation of P-loop led to a significant reduction in TC-augmented activity compared to the wild  
192 type, whereas either C-helix or C-turn mutant displayed no change in activity (Fig. 3C). It suggested  
193 that the P-loop, which is conserved in ATP8B1 homologs according to the multisequence alignment  
194 (Fig. 3B), is responsible for the recruitment of bile acids.

195  
196 **The substrate-bound ATP8B1-CDC50A structure revealed the release of autoinhibition.** To  
197 further investigate the substrate specificity of ATP8B1, we solved the cryo-EM structure of  
198 substrate-bound ATP8B1-CDC50A at a 3.98 Å resolution (Fig. S9). An extra density in the cavity  
199 formed by TM2, TM4 and TM6 of ATP8B1 could be fitted with a molecule of PS (Fig. 4A). The  
200 serine group of PS is stabilized by Thr143, Thr144 and Asn397, which are conserved in PS  
201 flippases (Fig. S10). The phosphate group and glycerol backbone of PS are embraced by Ser403,  
202 Asn989 and Ser994 (Fig. 4B), which are conserved residues in most P4-ATPases (Fig. S10).  
203 Notably, previous reports showed that clinical variants of S403Y and S994R of ATP8B1 were  
204 associated with the severe intrahepatic cholestasis disease PFIC1 (33, 34). Moreover, single  
205 mutation (T143A, T144A, N397A, S403Y, N989A or S994R) of the PS binding residues showed a  
206 significantly reduced ATPase activity in the presence of PS dissolved in TC (Fig. 4C).

207  
208 Remarkably, both the N-tail and C-tail of ATP8B1 are invisible in the PS-bound structure (Fig. 4A),  
209 suggesting the release of autoinhibition upon substrate binding. Superposition of this PS-bound  
210 structure against the apo-form ATP8B1 revealed significant rotations of TM1 and TM2 for ~10° and  
211 ~13°, respectively. In consequence, the A domain shifts towards the P domain, which is subject to  
212 being dephosphorylated (Fig. 4D). This conformation is similar to that of ATP8A1 in the E2Pi-PL  
213 state (14), in which  $\text{AlF}_4^-$  substituted  $\text{PO}_4^-$  at the proximity of residue Asp454 of the P domain,  
214 despite we could not fit  $\text{AlF}_4^-$  in our PS-bound structure due to the relatively low resolution of  
215 cytoplasmic domains (Fig. S9).

## 216 217 Discussion

218  
219 An autoinhibited state has been reported in the previous structures of yeast Drs2p, the C-tail of  
220 which was found to lock the cytoplasmic domains (32, 35). In addition, human ATP8A1 can be  
221 locked in an inhibited E2P state upon addition of the inhibitor  $\text{BeF}_3^-$  (14). Our present structures, in  
222 complex with either CD50A or CDC50B, showed that ATP8B1 adopts an autoinhibited E2P state,  
223 in which the N-tail and C-tail separately insert into the cytoplasmic inter-domain clefts and the  
224 residue Asp454 of the P domain is phosphorylated. ATPase activity assays indicated that the  
225 activity of ATPB1 could be inhibited by its own N-tail and C-tail, which might interrupt the inter-  
226 domain crosstalk. Most likely, an inhibited E2P state for inhibiting the activity of P-type ATPases is  
227 necessary at the homeostasis of membrane lipid asymmetry.

228  
229 Based on our findings and previous reports, we updated the Post-Albers cycle with an extra  
230 autoinhibited E2P state, which is an equilibrium state with the E2P state (Fig. 5). As shown in our  
231 PS-bound structure, this autoinhibition state could be switched to the E2Pi-PL state upon substrate  
232 binding (Fig. 5). In addition, our biochemical results indicated that bile acids can enhance the PS-  
233 stimulated ATPase activity of ATP8B1, similar to the previous reports that PI4P can stimulate the  
234 ATPase activity of yeast Drs2p (25, 36). Furthermore, deletion of the positively charged P-loop,  
235 which is highly conserved in ATP8B1 homologs, led to a reduced ATPase activity of ATP8B1 in

236 response to the addition of bile acids. In fact, ATP8B1 usually functions under a physiological  
237 environment with enriched bile acids; thus, the release of autoinhibition could be induced by the  
238 substrate, and further accelerated upon the easily recruited bile acids.

239  
240 In summary, ATP8B1 free of substrate basically adopts an autoinhibited conformation at the  
241 homeostatic membrane asymmetry. Once this asymmetry is altered, usually due to the  
242 phospholipid flow accompanying with the efflux of bile acids across the membrane, ATP8B1 is fully  
243 activated in the presence of both substrate and bile acids. The present structural analysis together  
244 with biochemical assays updated our understanding on the Post-Albers cycle.

## 245 246 **Materials and Methods**

247  
248 **Cloning and expression.** The full-length human *ATP8B1* (Uniprot: O43520), *CDC50A* (Uniprot:  
249 Q9NV96) and *CDC50B* (Uniprot: Q3MIR4) genes were synthesized after codon optimization for  
250 the mammalian cell expression system by Sangon Biotech Company. The wild-type *ATP8B1* and  
251 mutants were subcloned into a pCAG vector with an N-terminal Flag-tag (DYKDDDDK). *CDC50A*  
252 and *CDC50B* were respectively subcloned into the same vector with a C-terminal 6xHis-tag or an  
253 N-terminal 6xHis-tag, using One Step Cloning Kit (Vazyme).

254  
255 For protein expression, HEK293F cells were cultured in SMM 293T-II medium (Sino Biological Inc.)  
256 at 37°C with 5% CO<sub>2</sub>. Cells were transfected when the density reached ~2.5 × 10<sup>6</sup> cells per mL.  
257 For transfection, ~1.8 mg pCAG-ATP8B1 and ~0.3 mg pCAG-CDC50A/B were incubated with 4  
258 mg linear polyethylenimines (PEIs) (Polysciences, Inc) in 45 mL fresh medium for 15 min, followed  
259 by a 15-min static incubation. The transfected cells were grown at 37°C with 5% CO<sub>2</sub> for 48 h before  
260 harvesting. Cell pellets were resuspended in the lysis buffer containing 50 mM Tris-HCl pH 7.5,  
261 150 mM NaCl, 20% glycerol (w/v) after centrifugation at 1,500 g for 10 min. The suspension was  
262 frozen in liquid nitrogen and stored at -80°C for further use.

263  
264 All mutants were generated with a standard PCR-based strategy and were cloned, overexpressed  
265 and purified the same way as the wild-type protein.

266  
267 **Protein preparation.** For protein purification, 2 mM ATP (Sangon) and 2 mM MgCl<sub>2</sub> were added  
268 to the thawed suspension and the mixture was incubated with additional 1% (w/v) dodecyl-β-D-  
269 maltopyranoside (DDM; Bluepus) and 0.2% (w/v) cholesteryl hemisuccinate (CHS, Anatrace) at  
270 8°C for 2 h for membrane solubilization and protein extraction. After ultracentrifugation at 45,000  
271 rpm for 45 min (Beckman Type 70 Ti), the supernatant was incubated with the anti-Flag M2 affinity  
272 gel (Sigma) on ice for at least 40 min. Then the resin was washed by 30 mL of wash buffer  
273 containing 50 mM Tris-HCl pH 7.5, 150 mM NaCl, 10% (w/v) glycerol, with 0.02% glyco-diogenin  
274 (GDN, w/v, Anatrace) for ATP8B1-CDC50A or 0.06% digitonin (w/v, Apollo Scientific) for ATP8B1-  
275 CDC50B. The protein was eluted with 6 mL of wash buffer plus 200 µg/ml Flag peptide. The  
276 samples were further concentrated and purified by size-exclusion chromatography (SEC) on a  
277 Superose 6 Increase 10/300 GL column (GE Healthcare), pre-equilibrated with SEC buffer (50 mM  
278 Tris-HCl pH 7.5, 150 mM NaCl, and 0.02% GDN or 0.06% digitonin). The peak fractions were  
279 collected, concentrated to 4-6 mg/mL, frozen in liquid nitrogen and stored at -80°C before use.

280  
281 **Lipid and detergent/lipid mixture preparation.** Lipids were prepared in 20 mM Tris-HCl pH 7.5,  
282 75 mM KCl to a final concentration 10 mg/mL (~12.5 mM) by sonicating in a water bath sonicator  
283 at room temperature until forming a uniform solution. Bile acids (sodium salts) were dissolved at a  
284 final concentration of 100 mM in water and mixed with lipid stocks in a mole ratio of 3:1. 20% (w/v)  
285 DDM stocks were prepared in water and added to lipids solution in a final concentration of 1%. All  
286 the mixtures were frozen in liquid nitrogen and thawed at room temperature for 3 times, resulting  
287 in a clear and homogeneous solution at room temperature. Lipid stocks, bile acids and lipid  
288 mixtures were stored at -20°C before use.

289

290 **ATPase activity assays.** For the substrate-simulated ATPase activity assay, 0.01 mg (~0.05  $\mu\text{M}$ )  
291 of the purified proteins were pre-incubated at room temperature for 5 min with or without 600  $\mu\text{M}$   
292 lipids in 150  $\mu\text{L}$  reaction buffer, containing 20 mM Tris-HCl pH 7.5, 75 mM KCl, 2 mM  $\text{MgCl}_2$ , 0.02%  
293 DDM. The proteins or protein/lipid mixtures were cooled in ice and further mixed with an equal  
294 volume of pre-cooled reaction buffer containing 4 mM ATP. Reactions were performed at 37°C for  
295 20 min and the amount of released phosphate group (Pi) was quantitatively measured using the  
296 ATPase colorimetric Assay Kit (Innova Biosciences) in 96-well plates at  $\text{OD}_{650 \text{ nm}}$ .  
297

298 The bile-acid-augmented assays were measured similar to that mentioned above, except that the  
299 proteins were pre-incubated with detergent/lipids mixtures to a final lipid concentration of 200  $\mu\text{M}$ .  
300

301 **Cryo-EM sample preparation.** For the apo-form ATP8B1-CDC50A or ATP8B1-CDC50B complex,  
302 purified proteins were concentrated to 4.5 mg/mL. After centrifugation at 12,000 rpm for 10 min,  
303 3.5  $\mu\text{L}$  samples were placed on glow-discharged holey carbon grids (Quantifoil, Cu R1.2/1.3, 300-  
304 mesh) with the force -2, blot time 3 sec and plunged into liquid ethane by using Vitrobot Mark IV  
305 (FEI) at 8°C and 100% humidity.  
306

307 For the substrate binding sample, ATP8B1-CDC50A purified by the anti-Flag M2 affinity gel were  
308 pre-incubated with 2 mM  $\text{AlCl}_3$ , 10 mM NaF and 2 mM  $\text{MgCl}_2$  overnight. The mixture samples were  
309 further concentrated and purified by SEC. The purified ATP8B1-CDC50A were concentrated to 5  
310 mg/mL, incubated with additional 1 mM  $\text{AlCl}_3$ , 5 mM NaF, 2 mM  $\text{MgCl}_2$  and 10  $\mu\text{M}$  1,2-dioleoyl-sn-  
311 glycerol-3-phospho-L-serine (DOPS) for 1 h in ice. 3.5  $\mu\text{L}$  samples were placed on glow-discharged  
312 holey carbon grids (Quantifoil, Cu R1.2/1.3, 300-mesh) with the force -2, blot time 3 sec and  
313 plunged into liquid ethane by using Vitrobot Mark IV (FEI) at 8°C and 100% humidity.  
314

315 **Cryo-EM data collection.** The cryo-EM grids of apo-form and PS-bound ATP8B1-CDC50A were  
316 loaded into a Titan Krios transmission electron microscope (ThermoFisher Scientific) operating at  
317 300 KeV with a Gatan K2 Summit direct electron detector at the Center for Integrative Imaging of  
318 Hefei National Laboratory for Physical Sciences at the Microscale, University of Science and  
319 Technology of China (USTC). A total of 3003/2983 movie stacks were collected in super resolution  
320 mode at nominal magnification of 29,000  $\times$  with a defocus range from -2.5 to -1.5  $\mu\text{m}$ . Each movie  
321 stack of 32 frames was exposed for 6.4 sec under a dose rate of 10 e<sup>-</sup>/pixel/sec, resulting in a total  
322 dose of ~60 e<sup>-</sup>  $\text{\AA}^{-2}$ .  
323

324 The cryo-EM data of apo-form ATP8B1-CDC50B complex were collected at the Center for  
325 Biological Imaging at the Institute of Biophysics (IBP), Chinese Academy of Sciences (CAS). A total  
326 of 3717 micrographs were collected in super resolution mode with K3 camera at nominal  
327 magnification of 22,500  $\times$  with a defocus range from -1.5 to -2.0  $\mu\text{m}$ . Exposures of 6.4 s fractionated  
328 into 32 frames were collected at a dose rate of 1.5 or 1.6 e<sup>-</sup> per  $\text{\AA}^2$  per frame, corresponding to a  
329 total dose of ~60 e<sup>-</sup> per  $\text{\AA}^2$ .  
330

331 **Cryo-EM data processing.** All movie frames were corrected for gain reference and binned by a  
332 factor of 2 to yield a pixel size of 1.06  $\text{\AA}$  in RELION3.1 (37) through MotionCor2 (38). The contrast  
333 transfer function (CTF) parameters were estimated from the corrected movie frames using  
334 CTFFIND4 (39). After manual inspection of the micrographs, approximately 3,000 particles were  
335 manually selected. Particles were automatically extracted by RELION with binning factor 2. For  
336 apo-form ATP8B1-CDC50A, a total of 773,161 particles were picked and subjected to 2D  
337 classification. After multi-rounds of 2D classification, 399,091 particles were selected for further 3D  
338 classification with 3 classes using the reference generated by the 3D initial model. 182,618 particles  
339 from the best class were refined and re-extracted for further 3D refinement. To improve the EM  
340 density, 3D skip alignment classification, followed by CTF refinement and Bayesian Polishing were  
341 performed, giving rise to an average resolution of 3.36  $\text{\AA}$ .  
342

343 For apo-form ATP8B1-CDC50B, 2,561,714 particles were automatically extracted and subjected  
344 to 2D classification. 494,609 particles were selected for further 3D classification with 4 classes  
345 using the reference generated by the 3D initial model. 160,435 particles from one of the classes  
346 were further refined and post-processed to yield a 3.39 Å map.

347  
348 For PS-bound ATP8B1-CDC50A, 1,286,936 particles were automatically extracted and subjected  
349 to 2D classification. 159,960 particles were selected for further 3D classification with 3 classes  
350 using the reference generated by the 3D initial model. 159,960 particles from the best class were  
351 refined and re-extracted for further 3D refinement. 3D skip alignment classification, followed by  
352 CTF refinement and Bayesian Polishing were performed, giving rise to an average resolution of  
353 3.98 Å.

354  
355 The data processing pipelines are presented in SI Appendix. Map resolution was estimated with  
356 the gold-standard Fourier shell correlation 0.143 criterion (40). Local resolutions were estimated  
357 using Resmap with RELION3.1.

358  
359 **Model building and refinement.** The final sharpened map with a B-factor of  $-140 \text{ \AA}^2$  was used for  
360 model building in Coot (41). Initial structure models for ATP8B1 and CDC50B were predicted by  
361 SWISS-MODEL (42). The CDC50A structure was obtained from PDB 6K7L. The initial model of  
362 ATP8B1-CDC50A/B complexes were built by fitting the ATP8B1 and CDC50A/B model into the  
363 map using the UCSF Chimera. Then model building and refinement was accomplished manually  
364 by Coot (41). After several rounds of manual building, the model was almost completed built and  
365 automatically refined against the map by the `real_space_refine` program in PHENIX (43) with  
366 secondary structure and geometry restraints. Figures were prepared with Pymol (44) or Chimera  
367 (45).

## 368 369 **Acknowledgments**

370  
371 We thank Dr. Yongxiang Gao at the Center for Integrative Imaging, Hefei National Laboratory for  
372 Physical Sciences at the Microscale, University of Science and Technology of China, Xu-jing Li and  
373 the colleagues at the Center for Biological Imaging at the Institute of Biophysics (IBP), Chinese  
374 Academy of Sciences (CAS) for the cryo-EM image acquisition. This work was supported by the  
375 Ministry of Science and Technology of China (2019YFA0508500), the Strategic Priority Research  
376 Program of the Chinese Academy of Sciences (XDB37020202).

## 377 378 **Data availability**

379 The cryo-EM structures and cryo-EM density maps of the autoinhibited E2P state ATP8B1-  
380 CDC50A, the autoinhibited E2P state ATP8B1-CDC50B and PS-bound ATP8B1-CDC50A have  
381 been respectively deposited at PDB under the accession code of 7VGI, EMD-31970; EMD-31969,  
382 7VGH; 7VGJ, EMD-31971.

## 383 **Author contributions**

384 Yuxing Chen and Wen-Tao Hou conceived, designed and supervised the project. Meng-Ting  
385 Cheng designed and performed the experiments. Zhi-Peng Chen and Yu Chen. collected the Cryo-  
386 EM data and Yu Chen solved the structure. Meng-Ting Cheng and Wen-Tao Hou analyzed the  
387 data. Meng-Ting Cheng, Wen-Tao Hou, Yuxing Chen. and Cong-Zhao Zhou prepared the  
388 manuscript. All authors discussed the data and read the manuscript.

## 389 **Competing interests**

390 The authors declare no competing interests.

391  
392



## 393 References

- 394 1. P. A. Leventis, S. Grinstein, The distribution and function of phosphatidylserine in cellular  
395 membranes. *Annu Rev Biophys* **39**, 407-427 (2010).
- 396 2. J. C. Holthuis, A. K. Menon, Lipid landscapes and pipelines in membrane homeostasis.  
397 *Nature* **510**, 48-57 (2014).
- 398 3. J. P. Andersen *et al.*, P4-ATPases as Phospholipid Flippases-Structure, Function, and  
399 Enigmas. *Front Physiol* **7**, 275 (2016).
- 400 4. E. M. Bevers, P. L. Williamson, Getting to the Outer Leaflet: Physiology of  
401 Phosphatidylserine Exposure at the Plasma Membrane. *Physiol Rev* **96**, 605-645 (2016).
- 402 5. H. M. Hankins, R. D. Baldridge, P. Xu, T. R. Graham, Role of flippases, scramblases and  
403 transfer proteins in phosphatidylserine subcellular distribution. *Traffic* **16**, 35-47 (2015).
- 404 6. M. M. Babashamsi, S. Z. Koukhaloo, S. Halalkhor, A. Salimi, M. Babashamsi, ABCA1 and  
405 metabolic syndrome; a review of the ABCA1 role in HDL-VLDL production, insulin-glucose  
406 homeostasis, inflammation and obesity. *Diabetes Metab Syndr* **13**, 1529-1534 (2019).
- 407 7. M. Dyla, M. Kjaergaard, H. Poulsen, P. Nissen, Structure and Mechanism of P-Type  
408 ATPase Ion Pumps. *Annu Rev Biochem* **89**, 583-603 (2020).
- 409 8. J. A. Lyons, M. Timcenko, T. Dieudonne, G. Lenoir, P. Nissen, P4-ATPases: how an old  
410 dog learnt new tricks - structure and mechanism of lipid flippases. *Curr Opin Struct Biol* **63**,  
411 65-73 (2020).
- 412 9. H. Takatsu *et al.*, ATP9B, a P4-ATPase (a putative aminophospholipid translocase),  
413 localizes to the trans-Golgi network in a CDC50 protein-independent manner. *J Biol Chem*  
414 **286**, 38159-38167 (2011).
- 415 10. K. Segawa, S. Kurata, S. Nagata, The CDC50A extracellular domain is required for forming  
416 a functional complex with and chaperoning phospholipid flippases to the plasma membrane.  
417 *J Biol Chem* **293**, 2172-2182 (2018).
- 418 11. Y. Katoh, M. Katoh, Identification and characterization of CDC50A, CDC50B and CDC50C  
419 genes in silico. *Oncol Rep.* **12**: , 939-943 (2004).
- 420 12. S. Bryde *et al.*, CDC50 proteins are critical components of the human class-1 P4-ATPase  
421 transport machinery. *J Biol Chem* **285**, 40562-40572 (2010).
- 422 13. L. M. van der Velden *et al.*, Heteromeric interactions required for abundance and  
423 subcellular localization of human CDC50 proteins and class 1 P4-ATPases. *J Biol Chem*  
424 **285**, 40088-40096 (2010).
- 425 14. K. Y. M. Hiraizumi, T. Nishizawa, O. Nureki, Cryo-EM structures capture the transport cycle  
426 of the P4-ATPase flippase *Science* **365**, 1149–1155 (2019).
- 427 15. H. Nakanishi *et al.*, Transport Cycle of Plasma Membrane Flippase ATP11C by Cryo-EM.  
428 *Cell Rep* **32**, 108208 (2020).
- 429 16. H. Nakanishi *et al.*, Crystal structure of a human plasma membrane phospholipid flippase.  
430 *J Biol Chem* **295**, 10180-10194 (2020).
- 431 17. L. N. Bull *et al.*, A gene encoding a P-type ATPase mutated in two forms of hereditary  
432 cholestasis. *Nat Genet* **18**, 219-224 (1998).
- 433 18. E. F. Eppens *et al.*, FIC1, the protein affected in two forms of hereditary cholestasis, is  
434 localized in the cholangiocyte and the canalicular membrane of the hepatocyte. *J Hepatol*  
435 **35**, 436–443 (2001).
- 436 19. B. Stieger, The role of the sodium-taurocholate cotransporting polypeptide (NTCP) and of  
437 the bile salt export pump (BSEP) in physiology and pathophysiology of bile formation.  
438 *Handb Exp Pharmacol* **201**, 205-259 (2011).
- 439 20. A. R. Crawford *et al.*, Hepatic secretion of phospholipid vesicles in the mouse critically  
440 depends on mdr2 or MDR3 P-glycoprotein expression. Visualization by electron  
441 microscopy. *J Clin Invest* **100**, 2562-2567 (1997).
- 442 21. C. C. Paulusma *et al.*, ATP8B1 requires an accessory protein for endoplasmic reticulum  
443 exit and plasma membrane lipid flippase activity. *Hepatology* **47**, 268-278 (2008).

- 444 22. H. Takatsu *et al.*, Phospholipid flippase activities and substrate specificities of human type  
445 IV P-type ATPases localized to the plasma membrane. *J Biol Chem* **289**, 33543-33556  
446 (2014).
- 447 23. L. N. Bull, R. J. Thompson, Progressive Familial Intrahepatic Cholestasis. *Clinics in Liver*  
448 *Disease* **22**, 657-669 (2018).
- 449 24. Y. He, J. Xu, X. Wu, L. Li, Structures of a P4-ATPase lipid flippase in lipid bilayers. *Protein*  
450 *Cell* **11**, 458-463 (2020).
- 451 25. X. Zhou, T. T. Sebastian, T. R. Graham, Auto-inhibition of Drs2p, a Yeast Phospholipid  
452 Flippase, by Its Carboxyl-terminal Tail. *J Biol Chem* **288**, 31807-31815 (2013).
- 453 26. T. Kroll, S. H. J. Smits, L. Schmitt, Monomeric bile acids modulate the ATPase activity of  
454 detergent-solubilized ABCB4/MDR3. *J Lipid Res* **62**, 100087 (2021).
- 455 27. B. J. Johnson, J. Y. Lee, A. Pickert, I. L. Urbatsch, Bile acids stimulate ATP hydrolysis in  
456 the purified cholesterol transporter ABCG5/G8. *Biochemistry* **49**, 3403-3411 (2010).
- 457 28. L. Bai *et al.*, Transport mechanism of P4 ATPase phosphatidylcholine flippases. *Elife* **9**  
458 (2020).
- 459 29. M. G. Palmgren, P. Nissen, P-type ATPases. *Annu Rev Biophys* **40**, 243-266 (2011).
- 460 30. R. W. Albers, Biochemical aspects of active transport. *Annu Rev Biochem* **36**, 727-756  
461 (1967).
- 462 31. R. L. Post, S. Kume, T. Tobin, B. Orcutt, A. K. Sen, Flexibility of an active center in sodium-  
463 plus-potassium adenosine triphosphatase. *J Gen Physiol* **54**, 306-326 (1969).
- 464 32. M. Timcenko *et al.*, Structure and autoregulation of a P4-ATPase lipid flippase. *Nature* **571**,  
465 366-370 (2019).
- 466 33. A. Davit-Spraul *et al.*, ATP8B1 and ABCB11 analysis in 62 children with normal gamma-  
467 glutamyl transferase progressive familial intrahepatic cholestasis (PFIC): phenotypic  
468 differences between PFIC1 and PFIC2 and natural history. *Hepatology* **51**, 1645-1655  
469 (2010).
- 470 34. H. Egawa *et al.*, Intractable diarrhea after liver transplantation for Byler's disease:  
471 successful treatment with bile adsorptive resin. *Liver Transpl* **8**, 714-716 (2002).
- 472 35. L. Bai *et al.*, Autoinhibition and activation mechanisms of the eukaryotic lipid flippase  
473 Drs2p-Cdc50p. *Nat Commun* **10**, 4142 (2019).
- 474 36. M. Chalal, K. Moleschi, R. S. Molday, C-terminus of the P4-ATPase ATP8A2 functions in  
475 protein folding and regulation of phospholipid flippase activity. *Mol Biol Cell* **28**, 452-462  
476 (2017).
- 477 37. S. H. W. Scheres, Amyloid structure determination in RELION-3.1. *Acta Crystallogr D*  
478 *Struct Biol* **76**, 94-101 (2020).
- 479 38. S. Q. Zheng *et al.*, MotionCor2: anisotropic correction of beam-induced motion for  
480 improved cryo-electron microscopy. *Nat Methods* **14**, 331-332 (2017).
- 481 39. M. Su, goCTF: Geometrically optimized CTF determination for single-particle cryo-EM. *J*  
482 *Struct Biol* **205**, 22-29 (2019).
- 483 40. P. B. Rosenthal, R. Henderson, Optimal determination of particle orientation, absolute  
484 hand, and contrast loss in single-particle electron cryomicroscopy. *J Mol Biol* **333**, 721-745  
485 (2003).
- 486 41. P. Emsley, B. Lohkamp, W. G. Scott, K. Cowtan, Features and development of Coot. *Acta*  
487 *Crystallographica Section D* **66**, 486-501 (2010).
- 488 42. A. Waterhouse *et al.*, SWISS-MODEL: homology modelling of protein structures and  
489 complexes. *Nucleic Acids Res* **46**, W296-W303 (2018).
- 490 43. D. Liebschner *et al.*, Macromolecular structure determination using X-rays, neutrons and  
491 electrons: recent developments in Phenix. *Acta Crystallogr D Struct Biol* **75**, 861-877  
492 (2019).
- 493 44. Schrodinger, LLC (2015) The PyMOL Molecular Graphics System, Version 1.8.
- 494 45. E. F. Pettersen *et al.*, UCSF Chimera--a visualization system for exploratory research and  
495 analysis. *J Comput Chem* **25**, 1605-1612 (2004).

497 **Figures and Tables**  
498

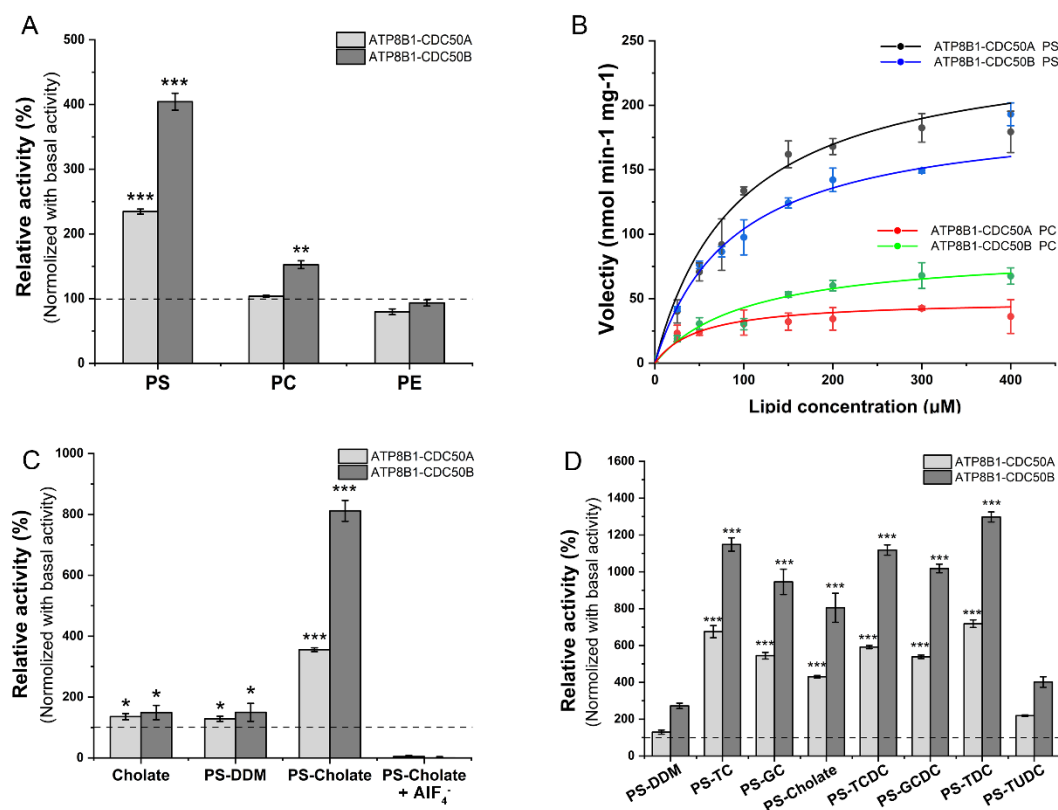

499  
500 **Figure 1.** Substrate-stimulated and bile-acid-augmented ATPase activity assays of ATP8B1-  
501 CDC50A and ATP8B1-CDC50B complexes. (A) ATPase activities of ATP8B1-CDC50A/B in  
502 different phospholipids compared to the corresponding basal activities. The final concentration of the  
503 phospholipid was set to 300 µM. (B) The phospholipid concentration-dependent ATPase  
504 activities of ATP8B1-CDC50A/B. Data points represent the mean ± S.D. of three measurements at  
505 37°C and were nonlinear fitted by the Michaelis-Menten equation. The  $V_{max}$  values were calculated  
506 by the phosphate produced in mole per mg of ATP8B1-CDC50A or ATP8B1-CDC50B protein per  
507 min. (C) Cholate-augmented ATPase activities of ATP8B1-CDC50A/B in the presence of PS. The  
508 phospholipid was dissolved in DDM or cholate sodium at a final concentration of 100 µM. AIF<sub>4</sub><sup>-</sup>  
509 was produced by mixing AlCl<sub>3</sub> and NaF. (D) Augmented ATPase activity of ATP8B1-CDC50A/B upon  
510 addition of PS dissolved in various bile acids. Abbreviations: TC, taurocholic acid; GC, glycocholic  
511 acid; TCDC, taurochenodoxycholic acid; GCDC, glycochenodeoxycholic acid; TDC,  
512 taurodeoxycholic acid; TUDC, tauroursodeoxycholate acid. Data were normalized against the basal  
513 activities of ATP8B1-CDC50A or ATP8B1-CDC50B, respectively. At least three independent  
514 assays were performed to calculate the means and standard deviations, and the data are presented  
515 as the means ± S.D. Two-tailed Student's t-test was used for the comparison of statistical  
516 significance. The p values of <0.05, 0.01 and 0.001 are indicated with \*, \*\* and \*\*\*, respectively.

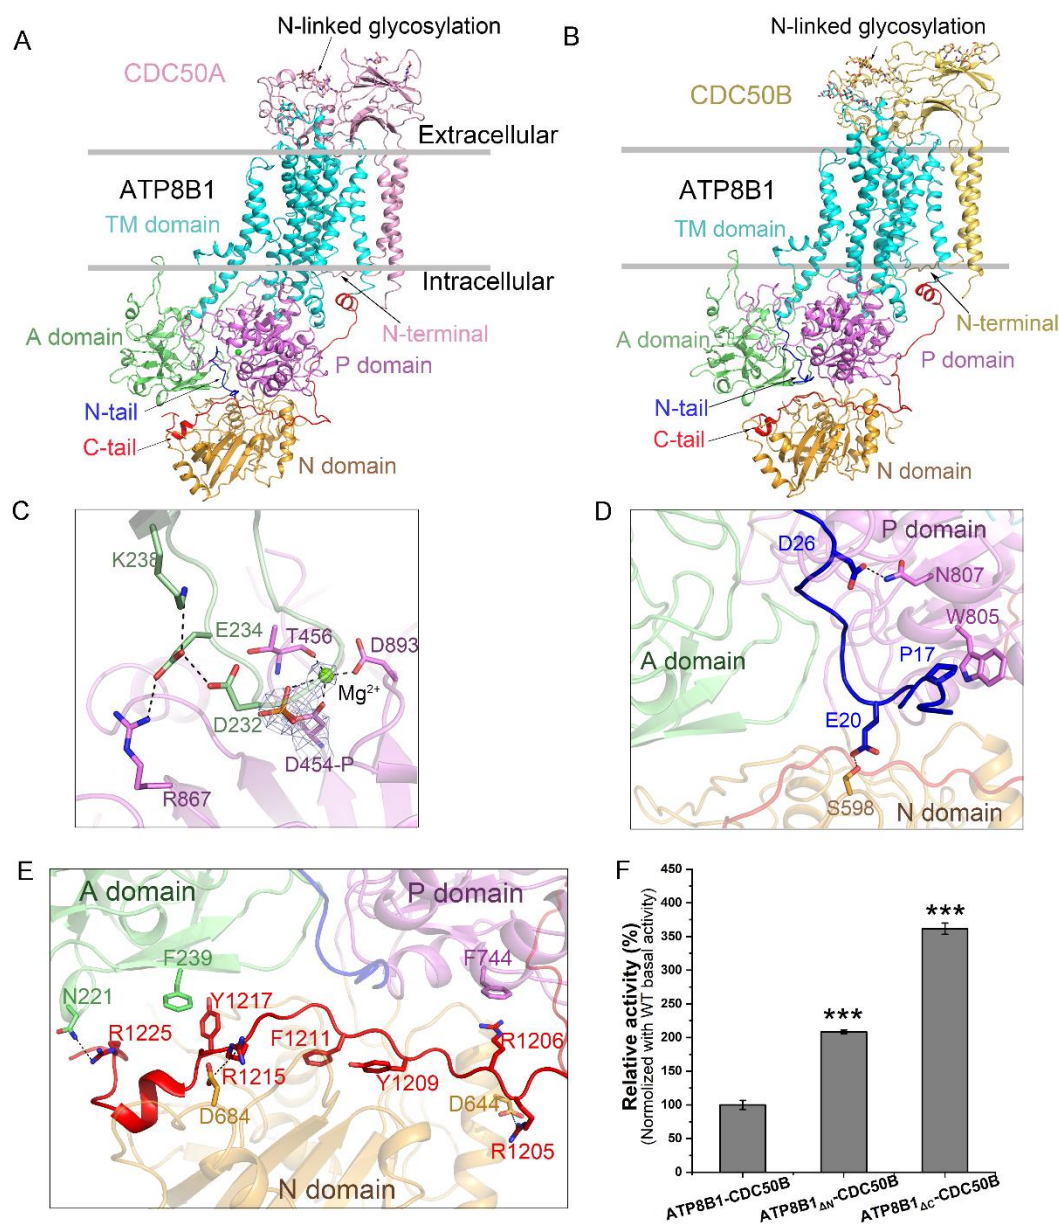

517  
 518 **Figure 2.** Structures of ATP8B1-CDC50A and ATP8B1-CDC50B at the autoinhibited  
 519 phosphorylated state. Overall structures of (A) ATP8B1-CDC50A and (B) ATP8B1-CDC50B in  
 520 cartoon. The major domains and motifs are labeled in different colors. The same color scheme is  
 521 used throughout the manuscript. (C) The phosphorylation site. The phosphorylated Asp454 from P  
 522 domain and related residues are shown in sticks. PO<sub>4</sub> is shown in sticks, and Mg<sup>2+</sup> is shown as  
 523 spheres. Densities are shown as gray mesh, contoured at 8σ. Interactions of (D) the N-tail and (E)  
 524 the C-tail with the cytoplasmic domains. All interacting residues are shown in sticks. (F) ATPase  
 525 activities of the N-tail or C-tail truncated ATP8B1 in complex with CDC50B compared to the wild  
 526 type. ΔN and ΔC stand for the deletion of N-terminal Met1~Glu30 and C-terminal  
 527 Ala1187~Ser1251, respectively. Data were normalized against the basal activity of ATP8B1-  
 528 CDC50B. At least three independent assays were performed to calculate the means and standard  
 529 deviations, and the data are presented as the means ± S.D. Two-tailed Student's t-test was used  
 530 for the comparison of statistical significance. The p values of <0.05, 0.01 and 0.001 are indicated  
 531 with \*, \*\* and \*\*\*, respectively.

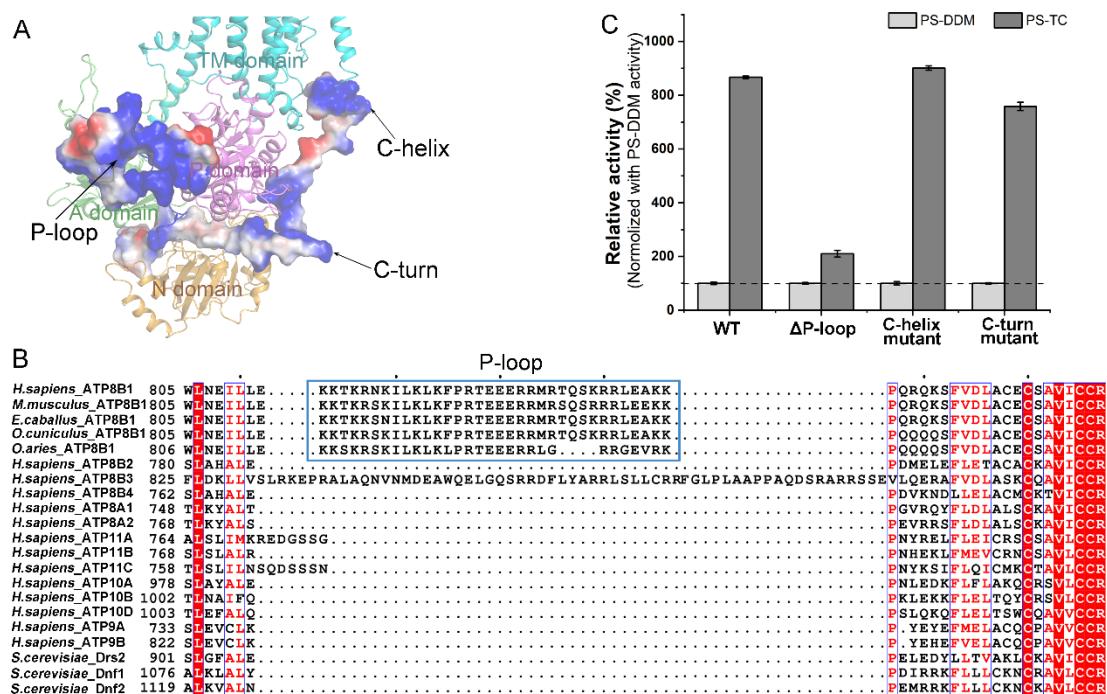

532  
 533 **Figure 3.** The P-loop conserved in ATP8B1 and homologs is essential for the recruitment of bile  
 534 acids. (A) The three positively charged regions of ATP8B1, namely the P-loop, C-helix and C-turn.  
 535 (B) Multiple-sequence alignment of the P-loop and flanking regions in P4-type ATPases. The P-  
 536 loop rich of positively charged residues in ATP8B1 and homologs are marked with a blue box. (C)  
 537 ATPase activities of ATP8B1-CDC50B mutants compared to the wild type, in the presence of 100  
 538  $\mu$ M PS dissolved in either DDM or TC. The activities in the presence of PS dissolved in TC were  
 539 normalized against the corresponding activity in the presence of PS dissolved in DDM. The  $\Delta$ P-  
 540 loop means deletion of K813-K846 of ATP8B1, whereas C-helix and C-turn mutants represent the  
 541 multiple mutations of K1177E-K1180E-H1181D-R1182E-K1183E-R1184E-K1186E and R1194T-  
 542 R1199S-R1200S-R1206S, respectively. At least three independent assays were performed to  
 543 calculate the means and standard deviations, and the data are presented as the means  $\pm$  S.D.

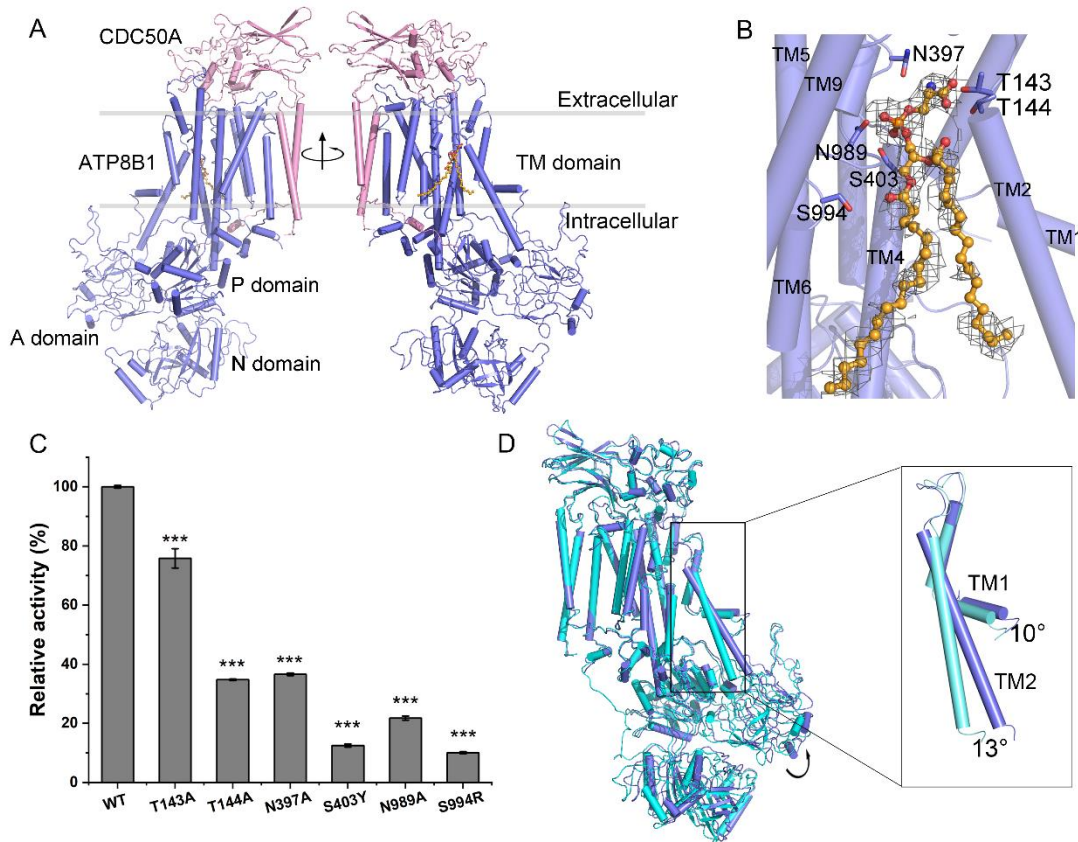

544

545

546 **Figure 4.** The PS-bound structure of ATP8B1-CDC50A and the PS-binding site. (A) Overall

547 structure of PS-bound ATP8B1-CDC50A. ATP8B1 is colored in slate, PS is shown in sticks and

548 spheres in orange. (B) The PS-binding site. The density of the PS is shown in gray mesh, contoured

549 at  $3\sigma$ . (C) ATPase activities of ATP8B1-CDC50B mutants compared to the wild type, in the

550 presence of 100  $\mu$ M PS dissolved in TC. Data were normalized against activity of the wild type. At

551 least three independent assays were performed to calculate the means and standard deviations,

552 and the data are presented as the means  $\pm$  S.D. Two-tailed Student's t-test is used for the

553 comparison of statistical significance. The p values of <math><0.05</math>, <math>0.01</math> and <math>0.001</math> are indicated with \*,

554 \*\*, and \*\*\*, respectively. (D) Superposition of autoinhibited E2P state and PS-bound state of

ATP8B1-CDC50A by aligning the TM7-10 of ATP8B1. The E2P state ATP8B1 is shown in cyan.

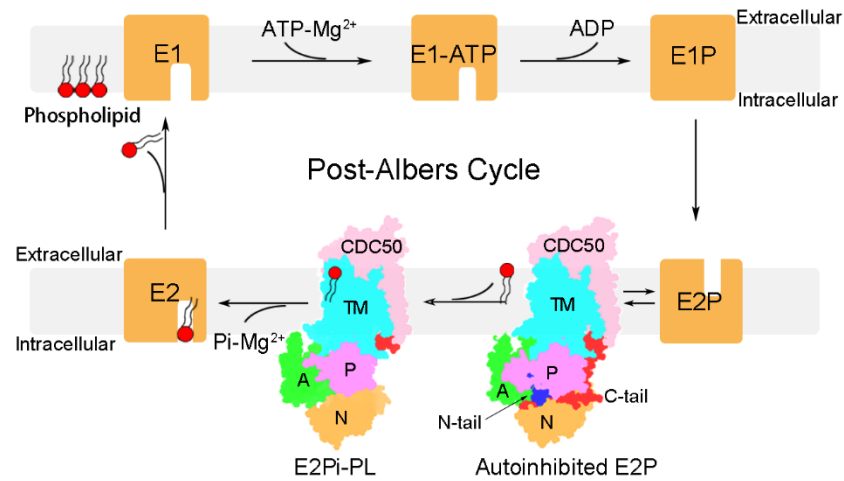

555  
556 **Figure 5.** An updated model of Post-Albers cycle. The two structures (autoinhibited E2P and E2Pi-  
557 PL) we report here are shown as the schemes, with the domains of ATP8B1-CDC50 shown in  
558 different colors, whereas the rest states are shown as yellow squares. Binding and hydrolyzing ATP  
559 would trigger transition of ATP8B1 from the state E1 to E1P. Afterwards, the rearrangement of the  
560 cytoplasmic domains makes ATP8B1 to adopt an E2P state, which is most likely equilibrated at the  
561 autoinhibited E2P state with the N-tail and C-tail inserting into the cytoplasmic inter-domain clefts.  
562 The release of autoinhibition could be induced upon phospholipid binding and further accelerated  
563 in the presence of bile acids, switching ATP8B1 at the E2Pi-PL state. The ATP8B1 at the E2 state  
564 with a dephosphorylated P domain undergoes domain rearrangement accompanying with the  
565 release of phospholipid; and finally ATP8B1 returns to the E1 state.
